# Supplementary material for: Berries as a Treatment for Obesity-Induced Inflammation: Evidence from Preclinical Models
Source: Nutrients. 2021 Jan 23;13(2):334. doi: 10.3390/nu13020334 (PMC7912458; doi:10.3390/nu13020334)
Supplement: Supplementary file 1 [file nutrients-13-00334-s001.pdf]

---

*Review*

# **Berries as a Treatment for Obesity-Induced Inflammation: Evidence from Preclinical Models**

Hannah Land Lail, Rafaela G. Feresin, Dominique Hicks, Blakely Stone, Emily Price and Desiree Wanders \*

**Table S1.** Summary of Animal Studies Examining Effects of Berries or their Components on Inflammation.

| Animal Studies                             |                                                                                                  |                                                                                                                                                               |                                                                                                                |           |
|--------------------------------------------|--------------------------------------------------------------------------------------------------|---------------------------------------------------------------------------------------------------------------------------------------------------------------|----------------------------------------------------------------------------------------------------------------|-----------|
| Model                                      | Treatment                                                                                        | Effect on Inflammation                                                                                                                                        | Mechanism                                                                                                      | Reference |
| <b>Blackberries</b>                        |                                                                                                  |                                                                                                                                                               |                                                                                                                |           |
| Male C57BL/6 mice                          | Anthocyanins from blackberry extract (200 mg/kg diet)                                            | Reduced gene expression of NF- $\kappa$ B, TNF- $\alpha$ , and IL-6 in liver                                                                                  | N/A                                                                                                            | [32]      |
| Female SKH-1 hairless mice                 | Topical application of blackberry extract (10 and 20%)                                           | Reduced expression of iNOS, PGE <sub>2</sub> , IL-6, and TNF- $\alpha$ in skin                                                                                | Reduced NF- $\kappa$ B, iNOS, COX-2, PGE <sub>2</sub> signaling                                                | [40]      |
| Male C57BL/6J mice                         | Freeze-dried blackberry in diet (20% of the diet)                                                | Null                                                                                                                                                          | N/A                                                                                                            | [30]      |
| Male C57BL/6J mice                         | Freeze-dried blackberry supplementation (6.3% of diet in weight; 470 mg C3G equivalents/kg diet) | Null                                                                                                                                                          | N/A                                                                                                            | [31]      |
| Wistar rats                                | Freeze-dried blackberry anthocyanin-rich extract (25 mg/kg BW/day)                               | Attenuated neuroinflammation; Decreased expression of TCK-1 in the hippocampus                                                                                | Stimulating tryptophan metabolism in the kynurenine pathway                                                    | [41]      |
| Male C57BL/6J mice                         | Fermented blueberry-blackberry beverage                                                          | Null                                                                                                                                                          | N/A                                                                                                            | [33]      |
| Female Sprague–Dawley rats                 | Freeze-dried blackberry powder (10% of the diet)                                                 | Reduced ovariectomy-induced increase in body weight<br>Reduced mRNA expression of NF- $\kappa$ B and COX-2 in the liver                                       | N/A                                                                                                            | [34]      |
| <b>Blueberries</b>                         |                                                                                                  |                                                                                                                                                               |                                                                                                                |           |
| Male C57BL/6 mice                          | Blueberry anthocyanins (200 mg/kg diet)                                                          | Decreased IL-6 and TNF- $\alpha$ in liver; Increased SOD and GPx antioxidant activity in liver and serum                                                      | Decreased NF- $\kappa$ B                                                                                       | [32]      |
| C57BL/6 mice                               | HFD supplemented with freeze-dried blueberry powder (5% or 10% of diet)                          | Reduced expression of IL-1 $\beta$ , IL-2, IL-7 TNF- $\alpha$ , GM-CSF and MCP-1<br>Reduction of T-helper 1 cells and Tc cells in the spleen                  | N/A                                                                                                            | [50]      |
| Male C57BL/6 mice                          | HFD supplemented with freeze-dried blueberry powder (4% of diet)                                 | Reduced TNF- $\alpha$ , MCP-1, and IL-10 expression, and increased GPx3 antioxidant activity in adipose tissue                                                | N/A                                                                                                            | [51]      |
| Obese Zucker rats                          | 2% Blueberry diet                                                                                | Reduced ROS, superoxide, peroxynitrite, IL-1 $\beta$ , IL-18 in the kidney                                                                                    | Reduced TLR4 expression and MAPK phosphorylation, inhibited NF- $\kappa$ B activity; Increased Nrf2 expression | [52]      |
| Male albino rats with STZ-induced diabetes | Blueberry anthocyanins (20, 40, and 80 mg/kg BW/day) for 12 weeks                                | Increased GSH, GPx activity<br>Decreased MDA, ROS levels in retinal cells<br>Decreased IL-1 $\beta$ in serum                                                  | Increased Nrf2 and HO-1                                                                                        | [55]      |
| Male Wistar rats                           | Freeze-dried blueberry powder (10% of HFD)                                                       | Decreased TNF- $\alpha$ and IL-6 in adipose tissue; Decreased MDA expression in the liver                                                                     | Reduced NF- $\kappa$ B                                                                                         | [76]      |
| Obese male Zucker Rats                     | Wild blueberry (8% of diet)                                                                      | Reduced serum IL-6, TNF- $\alpha$<br>Reduced hepatic NF- $\kappa$ B, IL-6, TNF- $\alpha$ , and CRP<br>Reduced adipose NF- $\kappa$ B, IL-6, and TNF- $\alpha$ | Reduced NF- $\kappa$ B in liver and adipose tissue                                                             | [53]      |
| Male C57BL/6J mice                         | Freeze-dried blueberry supplementation (5% w/w, 470 mg CGE/kg diet)                              | Null                                                                                                                                                          | N/A                                                                                                            | [31]      |
| <b>Strawberries</b>                        |                                                                                                  |                                                                                                                                                               |                                                                                                                |           |

|                                                        |                                                                                       |                                                                                                                                                                          |                                                             |      |
|--------------------------------------------------------|---------------------------------------------------------------------------------------|--------------------------------------------------------------------------------------------------------------------------------------------------------------------------|-------------------------------------------------------------|------|
| Male C57BL/6J mice                                     | Freeze-dried whole SB powder (2.35% of diet by weight)                                | Reduced expression of IkK $\beta$ , NOX2, IkB $\alpha$ , NOX4, mono-cyte binding, blood pressure, and inflammation in CA endothelial cells                               | Reduced NF- $\kappa$ B                                      | [88] |
| Male CD-1 mice                                         | Freeze-dried whole SB powder (2.5 or 5% of diet by weight)                            | Reduced TNF- $\alpha$ , IL-1 $\beta$ , IFN- $\gamma$ ; IL-17, decreased iNOS, p-53;<br>Increased GSH/GSSG ratio<br>Suppressed expressions of cleaved caspase-3 and c-JUN | Reduced NF- $\kappa$ B and COX-2                            | [89] |
| Male Wistar rats                                       | P3G-enriched strawberry powder (8 mg P3G/kg/day) for 8 weeks                          | Reduced inflammatory cell infiltration in liver and left ventricle                                                                                                       | N/A                                                         | [29] |
| Male Wistar rats                                       | Freeze-dried SB/BB powder (5:1) (6% of diet by weight) for 6 weeks                    | Reduced circulating MCP-1                                                                                                                                                | N/A                                                         | [81] |
| C57BL/6J mice                                          | 2.6% SB powder (equivalent to 1 human serving)                                        | Reduced circulating CRP                                                                                                                                                  | N/A                                                         | [82] |
| <b>Raspberries</b>                                     |                                                                                       |                                                                                                                                                                          |                                                             |      |
| Wild-type (WT) and AMPK $\alpha$ 1 <sup>-/-</sup> mice | HFD plus raspberry (5% HFD dry weight)                                                | Reduced TNF- $\alpha$ , IL-1 $\beta$ , IL-6, IL-8 in skeletal muscle                                                                                                     | Reduced of NF- $\kappa$ B/p65; dependent on AMPK $\alpha$ 1 | [90] |
| Male C57BL/6 mice                                      | HFD or HFD supplemented with a polyphenolic fraction from whole fruit, pulp, or seed. | Decreased the recruitment of macrophages and adipocyte hypertrophy in adipose tissue                                                                                     | Inhibited NLRP3 inflammasome activation                     | [91] |
| Male C57BL/6 mice                                      | HFHS diet supplemented with ellagic acid from raspberry seed flour                    | Reduced IL-6, IL-8, F4/80, TNF $\alpha$ , and MCP-1 expression                                                                                                           | N/A                                                         | [93] |
| C57BL/6 mice                                           | HFD supplemented with raspberry anthocyanins (200 mg/kg diet/day) for 12 weeks        | Reduced MDA, TNF- $\alpha$ , and IL-6 in the liver                                                                                                                       | Elevated SOD, GSH activities; down-regulated NF- $\kappa$ B | [92] |

**Table S2.** Summary of cell culture studies examining effects of berries or their components on inflammation.

| Cell Culture Studies                               |                                                                                                                                                                                                                                        |                                                                                                                           |                                                                                                           |           |
|----------------------------------------------------|----------------------------------------------------------------------------------------------------------------------------------------------------------------------------------------------------------------------------------------|---------------------------------------------------------------------------------------------------------------------------|-----------------------------------------------------------------------------------------------------------|-----------|
| Model                                              | Treatment                                                                                                                                                                                                                              | Effect on Inflammation                                                                                                    | Mechanism                                                                                                 | Reference |
| <i>Blackberries</i>                                |                                                                                                                                                                                                                                        |                                                                                                                           |                                                                                                           |           |
| RAW 264.7 Macrophages                              | Anthocyanin- and proanthocyanin- enriched fractions from blueberry-blackberry wine blends (50 and 100 µM)                                                                                                                              | Reduced expression of iNOS, NO, and COX-2                                                                                 | Reduced NF-κB signaling                                                                                   | [28]      |
| RAW 264.7 Macrophages                              | Anthocyanin-enriched fractions of blueberry-blackberry wine blends                                                                                                                                                                     | Reduced secretion of NO and TNF-α                                                                                         | Reduced NF-κB signaling                                                                                   | [39]      |
| RAW 264.7 Macrophages                              | Blackberry anthocyanins (0-20 µg/mL)                                                                                                                                                                                                   | Reduced IL-1β and TNFα mRNA expression                                                                                    | Inhibition of NF-κB translocation                                                                         | [38]      |
| <i>Blueberries</i>                                 |                                                                                                                                                                                                                                        |                                                                                                                           |                                                                                                           |           |
| Human Retinal Capillary Endothelial cells (HRCECs) | Blueberry anthocyanin extract (BAE) (Malvidin Malvidin-3-glucoside Malvidin-3-galactoside)                                                                                                                                             | Decreased ROS                                                                                                             | Increased catalase, superoxide dismutase<br>Downregulated Nox4<br>Decreased VEGF<br>Inhibited Akt pathway | [56]      |
| Human Retinal Pigment Epithelial cells             | Blueberry anthocyanin extract (BAE) (Malvidin Malvidin-3-glucoside Malvidin-3-galactoside)                                                                                                                                             | Inhibited apoptosis<br>Decreased VEGF<br>Altered Akt pathway                                                              | N/A                                                                                                       | [57]      |
| Human Aortic Endothelial cells (HAECs)             | Blueberry metabolites (700nM benzoic acid-4-sulfate, 5µM hippuric acid, 3µM hydroxyhippuric acid, 75nM isovanillic acid-3-sulfate, and 75nM vanillic acid-4-sulfate)                                                                   | Reduced monocyte adhesion<br>Reduced inflammatory markers IL-8, MCP1, and VCAM-1                                          | N/A                                                                                                       | [69]      |
| Human Umbilical Vein Endothelial cells (HU-VECs)   | Anthocyanin-rich- fraction from blueberries (from 0.01 to 10 µg/mL)                                                                                                                                                                    | Reduced THP-1 adhesion                                                                                                    | Reduced monocyte adhesion of THP-1 to HUVECs by decreasing E-selectin concentrations                      | [70]      |
| Human Aortic Endothelial cells (HAECs)             | Blueberry metabolites (700nM benzoic acid-4-sulfate, 5µM hippuric acid, 3µM hydroxyhippuric acid, 75nM isovanillic acid-3-sulfate, and 75nM vanillic acid-4-sulfate<br>Or anthocyanins: malvidin-3-glucoside and cyanidin-3-glucoside) | Reversed the effects of palmitate by decreasing ROS, Nox4, chemokines, ICAM-1, IκBα, monocyte adhesion, and NO production | N/A                                                                                                       | [71]      |
| Human Umbilical Vein Endothelial cells             | Blueberry anthocyanin extract (BAE) (Malvidin Malvidin-3-glucoside Malvidin-3-galactoside at 1, 10, 50, and 100µM)                                                                                                                     | Decreased MCP1, ICAM-1, and VCAM-1 expression<br>Decreased IκBα degradation and altered nuclear translocation of P65      | Inhibited NF-κB pathway                                                                                   | [72]      |
| <i>Strawberries</i>                                |                                                                                                                                                                                                                                        |                                                                                                                           |                                                                                                           |           |
| RAW 264.7 Macrophages                              | Sheolhyang strawberry fraction                                                                                                                                                                                                         | Reduced TNF-α, IL-1β, and iNOS expressions                                                                                | Blocked degradation of IκBα<br>Inhibited NF-κB and MAPK signaling                                         | [86]      |
| Human Dermal Fibroblasts (HDF)                     | Alba strawberry methanolic extracts (25–1000 µg/mL)                                                                                                                                                                                    | Reduced ROS/NO                                                                                                            | N/A                                                                                                       | [85]      |

|                       |                                                    |                                                                                                                             |                                                                   |      |
|-----------------------|----------------------------------------------------|-----------------------------------------------------------------------------------------------------------------------------|-------------------------------------------------------------------|------|
| RAW 264.7 Macrophages | SB extract (100 µg/mL)                             | Reduced LPS-induced ROS, TNF- $\alpha$ , IL-1 $\beta$ , and IL-6, pI $\kappa$ $\beta$ $\alpha$                              | Increased Nrf2; reduced NF- $\kappa$ B; increased AMPK-activation | [87] |
| <b>Raspberries</b>    |                                                    |                                                                                                                             |                                                                   |      |
| RAW 264.7 Macrophages | Red raspberry extract (100, 150 and 200 µg/mL)     | Attenuated LPS/IFN- $\gamma$ -induced inflammatory responses in RAW 264.7 cells                                             | Blocked activation of NF- $\kappa$ B and MAPK/JNK                 | [95] |
| Murine Macrophages    | Black raspberry fractions                          | Suppressed mRNA and protein expressions of TNF- $\alpha$ , IL-6, and IL-1 $\beta$                                           | Inhibited MAPKs and STAT3                                         | [96] |
| Microglia cells       | Raspberries subjected to <i>in vitro</i> digestion | Inhibited microglial proinflammatory activation by LPS; decreased Iba1 expression, TNF- $\alpha$ release, and NO production | N/A                                                               | [94] |
